# Supplementary material for: Optimization and evaluation of Luminex performance with supernatants of antigen-stimulated peripheral blood mononuclear cells
Source: Springer Nature journal article supplement (doi:10.1186/s12865-016-0182-8), 2016-11-11

**A**

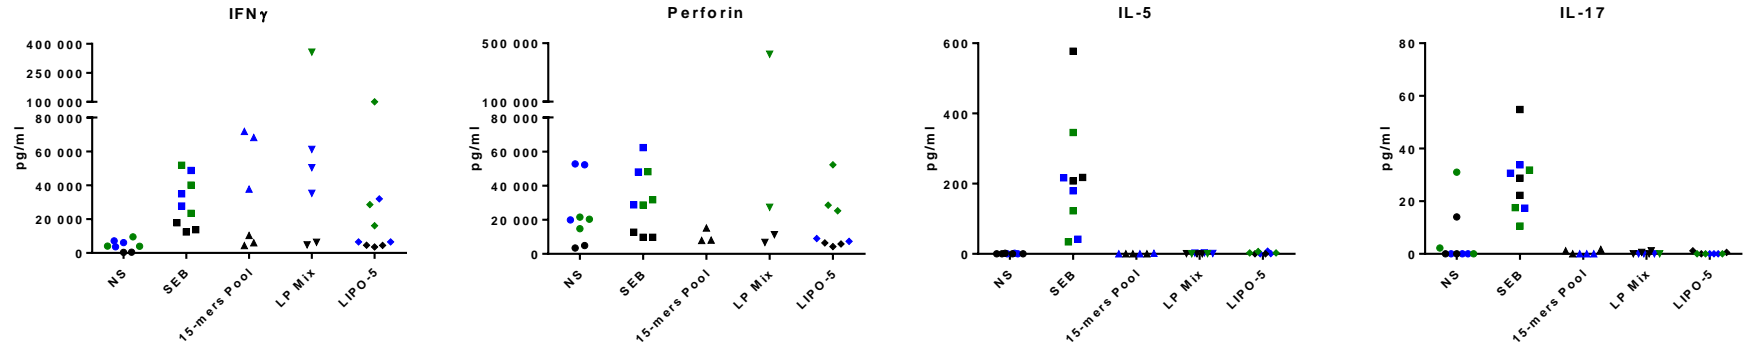

**B**

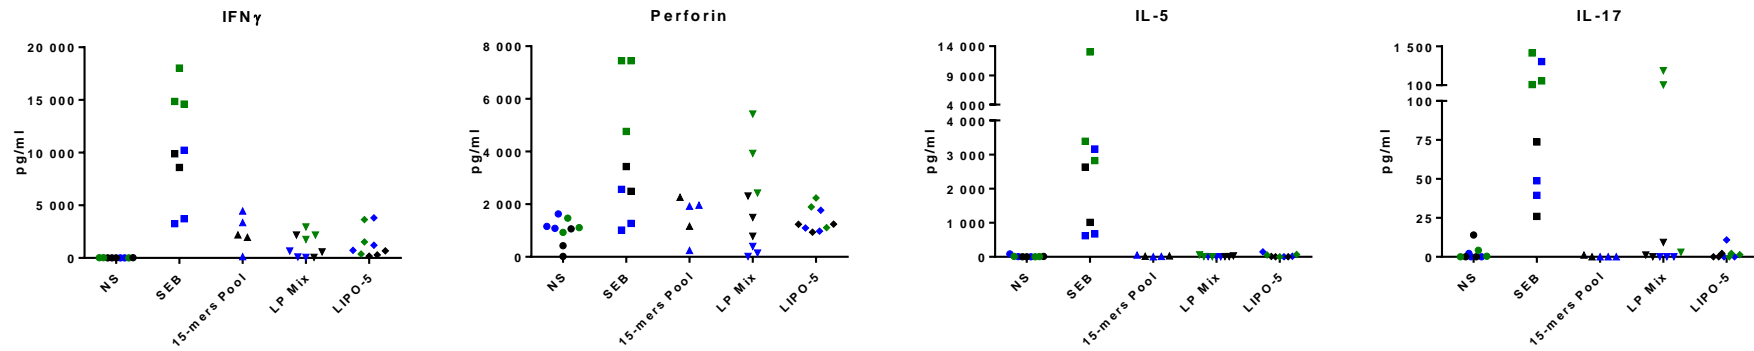

Supplement: MOESM1 [file 12865_2016_182_MOESM1_ESM.pdf]
