# Supplementary material for: Optimization and evaluation of Luminex performance with supernatants of antigen-stimulated peripheral blood mononuclear cells
Source: Springer Nature journal article supplement (doi:10.1186/s12865-016-0182-8), 2016-11-11
Supplement: MOESM3 [file 12865_2016_182_MOESM3_ESM.pdf]

**PBMC viability (%)**

|                   |                                              |                         | D1   | D2   | D3   | D4          | D5          | D6          | D7          |
|-------------------|----------------------------------------------|-------------------------|------|------|------|-------------|-------------|-------------|-------------|
| First experiment  | Healthy donor 1 (1,0 million cells per well) | NS                      | 89,4 | 83,3 | 82,5 | 80,1        | 77,9        | 75,6        | <b>63,4</b> |
| First experiment  | Healthy donor 1 (1,0 million cells per well) | PPD (1µg/ml)            | 92,7 | 83,8 | 81,3 | 76,8        | 74,7        | 76,4        | <b>68,2</b> |
| First experiment  | Healthy donor 1 (1,0 million cells per well) | SEB ( <b>100ng/ml</b> ) | 86,8 | 79,4 | 71,6 | <b>57,1</b> | <b>38,9</b> | <b>37,0</b> | <b>31,5</b> |
| Second experiment | Healthy donor 1 (1,0 million cells per well) | NS                      | 82,3 | 82,7 | ND   | ND          | 78,6        | ND          | ND          |
| Second experiment | Healthy donor 1 (0,5 million cells per well) | NS                      | 75,0 | 76,9 | ND   | ND          | 79,3        | ND          | ND          |
| Second experiment | Healthy donor 1 (1,0 million cells per well) | PPD (1µg/ml)            | 82,1 | 82,8 | ND   | ND          | 78,5        | ND          | ND          |
| Second experiment | Healthy donor 1 (0,5 million cells per well) | PPD (1µg/ml)            | 74,9 | 75,0 | ND   | ND          | 74,1        | ND          | ND          |
| Second experiment | Healthy donor 1 (1,0 million cells per well) | SEB ( <b>100ng/ml</b> ) | 79,4 | 79,4 | ND   | ND          | <b>60,3</b> | ND          | ND          |
| Second experiment | Healthy donor 1 (0,5 million cells per well) | SEB ( <b>100ng/ml</b> ) | 74,1 | 75,8 | ND   | ND          | <b>67,2</b> | ND          | ND          |
| Second experiment | Healthy donor 1 (1,0 million cells per well) | SEB (10ng/ml)           | 88,2 | 82,4 | ND   | ND          | 76,8        | ND          | ND          |
| Second experiment | Healthy donor 1 (0,5 million cells per well) | SEB (10ng/ml)           | 74,8 | 79,3 | ND   | ND          | 71,7        | ND          | ND          |

ND: Not Determined
