# Supplementary material for: Optimization and evaluation of Luminex performance with supernatants of antigen-stimulated peripheral blood mononuclear cells
Source: Springer Nature journal article supplement (doi:10.1186/s12865-016-0182-8), 2016-11-11
Supplement: MOESM7 [file 12865_2016_182_MOESM7_ESM.pdf]

**Intra-assay variability**

| Plates            | IL-17F       | GM-CSF       | IFN $\gamma$ | IL-10        | CCL20/MIP3 $\alpha$ | IL-13        | IL-17A       | IL-22        | IL-9         | IL-2         | IL-5         | IL-27        | TNF $\alpha$ |            |
|-------------------|--------------|--------------|--------------|--------------|---------------------|--------------|--------------|--------------|--------------|--------------|--------------|--------------|--------------|------------|
|                   | Obs Conc %CV | Obs Conc %CV | Obs Conc %CV | Obs Conc %CV | Obs Conc %CV        | Obs Conc %CV | Obs Conc %CV | Obs Conc %CV | Obs Conc %CV | Obs Conc %CV | Obs Conc %CV | Obs Conc %CV | Obs Conc %CV |            |
| 1                 | 0,9          | 0,5          | 2,3          | 7,8          | 2,1                 | 1,3          | 2,0          | 6,7          | 0,1          | 3,5          | 0,8          | 5,0          | 4,4          |            |
| 2                 | 2,6          | 2,8          | 6,3          | 5,6          | 1,6                 | 9,2          | 4,7          | 1,0          | 0,8          | 2,3          | 1,0          | 0,2          | 17,8         |            |
| 3                 | 8,5          | 5,9          | 2,6          | 5,0          | 5,8                 | 9,4          | 8,3          | 7,6          | 12,6         | 8,6          | 9,2          | 9,2          | 8,9          |            |
| 4                 | 7,5          | 11,3         | 9,5          | 12,6         | 7,9                 | 9,1          | 8,9          | 13,7         | 6,4          | 8,1          | 6,8          | 13,2         | 9,2          |            |
| 5                 | 2,9          | 2,6          | 1,4          | 2,4          | 1,5                 | 4,0          | 6,4          | 4,7          | 1,7          | 8,1          | 3,4          | 6,0          | 1,5          |            |
| 6                 | 1,3          | 4,9          | 1,2          | 7,2          | 4,0                 | 4,8          | 1,8          | 5,6          | 5,3          | 2,4          | 6,6          | 5,7          | 2,6          |            |
| 7                 | 3,8          | 2,1          | 0,6          | 4,3          | 0,2                 | 0,7          | 2,1          | 10,4         | 8,5          | 0,8          | 2,9          | 0,3          | 1,1          |            |
| 8                 | 0,3          | 0,4          | 5,6          | 3,7          | 0,7                 | 2,2          | 0,6          | 0,9          | 3,1          | 1,8          | 4,5          | 1,3          | 4,4          |            |
| 9                 | 10,9         | 5,0          | 2,1          | 8,4          | 6,2                 | 6,8          | 3,6          | 4,5          | 9,3          | 11,3         | 6,8          | 8,1          | 6,2          |            |
| 10                | 8,6          | 7,1          | 3,3          | 4,6          | 6,6                 | 2,9          | 2,1          | 5,9          | 2,9          | 4,9          | 8,2          | 0,7          | 1,9          |            |
| 11                | 9,1          | 0,9          | 5,6          | 9,6          | 2,2                 | 4,2          | 1,6          | 0,9          | 3,2          | 3,1          | 2,1          | 0,9          | 2,0          |            |
| 12                | 1,6          | 6,5          | 4,7          | 3,2          | 5,8                 | 3,5          | 0,1          | 2,9          | 8,2          | 0,5          | 0,2          | 5,1          | 4,3          |            |
| 13                | 1,7          | 0,9          | 4,2          | 5,1          | 4,0                 | 0,4          | 4,2          | 5,5          | 5,4          | 2,1          | 7,2          | 2,4          | 3,3          |            |
| <b>Pooled %CV</b> | <b>4,6</b>   | <b>3,9</b>   | <b>3,8</b>   | <b>6,1</b>   | <b>3,7</b>          | <b>4,5</b>   | <b>3,6</b>   | <b>5,4</b>   | <b>5,2</b>   | <b>4,4</b>   | <b>4,6</b>   | <b>4,5</b>   | <b>5,2</b>   | <b>4,6</b> |
| 1                 | 4,7          | 5,3          | 1,7          | 1,9          | 3,6                 | 4,2          | 3,3          | 4,5          | 11,4         | 2,3          | 4,2          | 0,2          | 0,1          |            |
| 2                 | 0,8          | 1,5          | 2,0          | 0,8          | 3,0                 | 3,0          | 0,7          | 0,3          | 1,4          | 2,7          | 0,7          | 0,5          | 1,8          |            |
| 3                 | 1,0          | 7,5          | 1,5          | 5,4          | 1,9                 | 3,2          | 3,6          | 1,7          | 2,4          | 1,1          | 3,1          | 1,1          | 4,9          |            |
| 4                 | 4,9          | 5,2          | 1,6          | 2,4          | 0,1                 | 0,9          | 2,8          | 9,5          | 2,9          | 5,9          | 0,8          | 1,7          | 2,1          |            |
| 5                 | 2,1          | 7,3          | 0,6          | 7,3          | 2,7                 | 1,0          | 1,2          | 4,4          | 2,6          | 8,5          | 4,1          | 6,4          | 3,7          |            |
| 6                 | 1,0          | 4,3          | 3,3          | 0,6          | 0,2                 | 0,4          | 4,8          | 3,7          | 3,3          | 14,3         | 3,2          | 2,9          | 1,9          |            |
| 7                 | 4,7          | 0,4          | 1,5          | 3,2          | 0,5                 | 3,1          | 1,8          | 0,5          | 2,8          | 1,3          | 4,0          | 4,5          | 0,6          |            |
| 8                 | 16,3         | 18,3         | 4,4          | 10,9         | 9,9                 | 4,9          | 14,8         | 25,7         | 16,8         | 14,0         | 6,3          | 9,9          | 11,7         |            |
| 9                 | 6,4          | 0,8          | 6,6          | 5,0          | 4,0                 | 0,0          | 2,0          | 0,8          | 0,3          | 0,9          | 3,3          | 4,4          | 0,0          |            |
| 10                | 5,9          | 3,5          | 0,4          | 7,0          | 2,6                 | 2,9          | 2,6          | 6,2          | 1,8          | 5,0          | 5,7          | 0,7          | 2,4          |            |
| 11                | 1,2          | 1,5          | 6,6          | 8,0          | 1,1                 | 1,8          | 2,0          | 4,2          | 9,7          | 3,5          | 2,2          | 5,0          | 5,3          |            |
| 12                | 3,8          | 1,5          | 1,8          | 0,3          | 2,1                 | 1,6          | 1,4          | 3,5          | 3,2          | 3,6          | 2,3          | 3,4          | 1,5          |            |
| 13                | 2,5          | 3,5          | 2,4          | 1,9          | 0,1                 | 3,3          | 2,1          | 3,6          | 2,9          | 4,0          | 4,4          | 2,0          | 1,9          |            |
| <b>Pooled %CV</b> | <b>4,2</b>   | <b>4,6</b>   | <b>2,6</b>   | <b>4,2</b>   | <b>2,4</b>          | <b>2,3</b>   | <b>3,3</b>   | <b>5,3</b>   | <b>4,7</b>   | <b>5,2</b>   | <b>3,4</b>   | <b>3,3</b>   | <b>2,9</b>   | <b>3,7</b> |

**Inter-assay variability**

| Plates     | IL-17F     | GM-CSF     | IFN $\gamma$ | IL-10      | CCL20/MIP3 $\alpha$ | IL-13      | IL-17A     | IL-22      | IL-9       | IL-2       | IL-5       | IL-27       | TNF $\alpha$ |            |
|------------|------------|------------|--------------|------------|---------------------|------------|------------|------------|------------|------------|------------|-------------|--------------|------------|
|            | Obs Conc   | Obs Conc   | Obs Conc     | Obs Conc   | Obs Conc            | Obs Conc   | Obs Conc   | Obs Conc   | Obs Conc   | Obs Conc   | Obs Conc   | Obs Conc    | Obs Conc     |            |
| 1          | 1584,0     | 3973,9     | 640,9        | 71,0       | 346,4               | 457,2      | 732,2      | 2392,0     | 512,2      | 802,2      | 371,6      | 3539,9      | 132,3        |            |
| 2          | 1466,5     | 3390,0     | 749,9        | 71,9       | 325,5               | 417,3      | 683,2      | 1993,9     | 454,0      | 750,2      | 329,8      | 3469,4      | 125,4        |            |
| 3          | 1372,5     | 3608,7     | 756,4        | 68,5       | 332,3               | 455,3      | 707,8      | 2451,8     | 486,6      | 732,5      | 393,6      | 3305,0      | 125,0        |            |
| 4          | 1493,4     | 4070,2     | 677,0        | 75,6       | 373,8               | 499,6      | 743,7      | 2436,3     | 518,8      | 806,3      | 372,5      | 4406,3      | 140,9        |            |
| 5          | 1531,4     | 3986,9     | 714,3        | 66,4       | 337,1               | 448,6      | 728,4      | 2380,1     | 451,9      | 809,4      | 356,1      | 4290,8      | 126,7        |            |
| 6          | 1479,4     | 3826,9     | 731,7        | 70,2       | 328,6               | 475,3      | 741,9      | 2232,9     | 487,0      | 748,4      | 364,5      | 3740,9      | 135,7        |            |
| 7          | 1502,0     | 3654,1     | 607,1        | 68,8       | 338,7               | 471,7      | 723,8      | 2398,8     | 510,3      | 761,8      | 354,0      | 3799,0      | 131,7        |            |
| 8          | 1584,9     | 4169,9     | 677,1        | 78,4       | 348,9               | 504,2      | 791,2      | 2563,2     | 533,0      | 826,4      | 427,9      | 3749,2      | 149,2        |            |
| 9          | 1330,5     | 3180,5     | 609,8        | 63,2       | 319,1               | 437,0      | 655,6      | 2128,3     | 471,3      | 721,9      | 345,3      | 3530,5      | 125,3        |            |
| 10         | 1403,1     | 3599,8     | 840,4        | 78,3       | 327,4               | 447,3      | 698,7      | 2096,7     | 459,1      | 749,0      | 367,9      | 3079,4      | 128,6        |            |
| 11         | 1389,3     | 3705,3     | 603,6        | 67,5       | 328,5               | 439,5      | 724,2      | 2418,1     | 478,3      | 735,9      | 357,4      | 4223,0      | 116,7        |            |
| 12         | 1335,1     | 3442,6     | 594,1        | 63,1       | 325,5               | 412,6      | 656,9      | 2096,3     | 447,4      | 694,8      | 344,4      | 3555,5      | 116,2        |            |
| 13         | 1386,4     | 3679,6     | 717,2        | 72,5       | 393,7               | 463,5      | 723,7      | 2322,1     | 518,7      | 761,6      | 332,2      | 3371,6      | 129,1        |            |
| <b>%CV</b> | <b>6,0</b> | <b>7,7</b> | <b>10,8</b>  | <b>7,1</b> | <b>6,3</b>          | <b>6,0</b> | <b>5,1</b> | <b>7,5</b> | <b>6,0</b> | <b>5,1</b> | <b>7,2</b> | <b>10,8</b> | <b>7,0</b>   | <b>7,1</b> |
| 1          | 6721,1     | 15626,4    | 2917,4       | 354,1      | 1781,2              | 2179,5     | 3520,0     | 10074,9    | 2460,6     | 3702,5     | 1626,4     | 18425,4     | 675,3        |            |
| 2          | 6809,7     | 18488,6    | 3963,5       | 398,8      | 1643,1              | 2193,0     | 3637,1     | 11333,0    | 2625,3     | 3823,9     | 1679,7     | 21145,2     | 731,0        |            |
| 3          | 6196,5     | 16254,9    | 2783,6       | 304,7      | 1300,1              | 1858,9     | 3220,6     | 9360,1     | 2320,6     | 3427,6     | 1528,8     | 16932,1     | 580,4        |            |
| 4          | 6487,6     | 17339,5    | 3050,8       | 329,0      | 1464,1              | 2238,0     | 3547,2     | 10087,5    | 2576,5     | 3762,9     | 1734,4     | 20477,8     | 703,4        |            |
| 5          | 6207,9     | 15080,0    | 3064,6       | 310,3      | 1405,2              | 2081,1     | 3152,0     | 10221,0    | 2040,2     | 3510,2     | 1585,1     | 19352,4     | 608,9        |            |
| 6          | 5928,7     | 16335,1    | 2992,2       | 321,1      | 1393,8              | 2085,5     | 3230,9     | 9703,5     | 2293,2     | 3475,9     | 1630,9     | 18497,1     | 656,8        |            |
| 7          | 6443,6     | 18850,2    | 2755,5       | 311,9      | 1508,1              | 2094,5     | 3528,4     | 10374,5    | 2515,6     | 3494,5     | 1515,3     | 15279,3     | 676,3        |            |
| 8          | 5671,3     | 15099,6    | 2737,8       | 317,0      | 1441,5              | 2123,7     | 3272,6     | 8749,5     | 2095,3     | 3676,1     | 1710,6     | 17323,6     | 631,7        |            |
| 9          | 6230,2     | 15936,2    | 2854,2       | 316,6      | 1490,8              | 2149,2     | 3343,2     | 9083,0     | 2463,8     | 3526,6     | 1690,1     | 17722,1     | 684,9        |            |
| 10         | 6209,9     | 16675,2    | 3892,9       | 388,3      | 1534,0              | 2118,3     | 3648,3     | 9831,8     | 2300,2     | 3682,4     | 1724,0     | 16502,8     | 699,1        |            |
| 11         | 6827,2     | 16635,8    | 2831,0       | 333,8      | 1429,7              | 2201,1     | 3465,5     | 11154,9    | 2304,6     | 3727,4     | 1774,2     | 21793,9     | 683,9        |            |
| 12         | 6191,1     | 15699,5    | 2720,9       | 314,1      | 1397,0              | 2030,2     | 3212,1     | 9278,7     | 2144,4     | 3418,6     | 1630,6     | 19127,1     | 640,0        |            |
| 13         | 6275,2     | 14275,7    | 3202,8       | 326,5      | 1482,3              | 2088,6     | 3273,9     | 9531,0     | 2192,5     | 3500,5     | 1596,2     | 17693,0     | 625,2        |            |
| <b>%CV</b> | <b>5,3</b> | <b>8,0</b> | <b>13,5</b>  | <b>9,0</b> | <b>8,2</b>          | <b>4,5</b> | <b>5,2</b> | <b>7,6</b> | <b>7,9</b> | <b>3,8</b> | <b>4,8</b> | <b>10,2</b> | <b>6,4</b>   | <b>7,3</b> |
