# Supplementary material for: Optimization and evaluation of Luminex performance with supernatants of antigen-stimulated peripheral blood mononuclear cells
Source: Springer Nature journal article supplement (doi:10.1186/s12865-016-0182-8), 2016-11-11

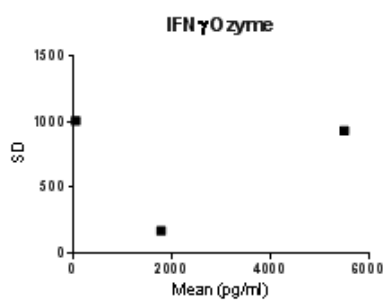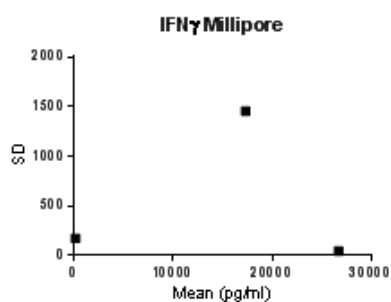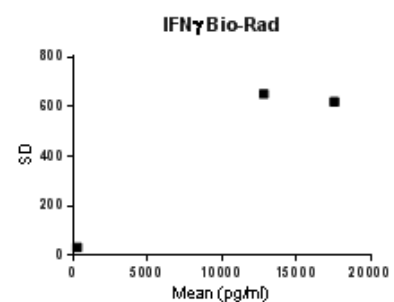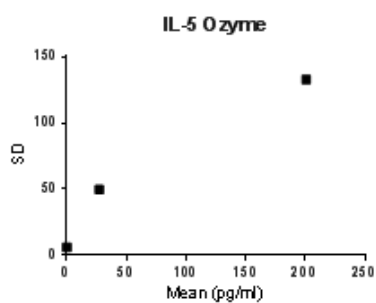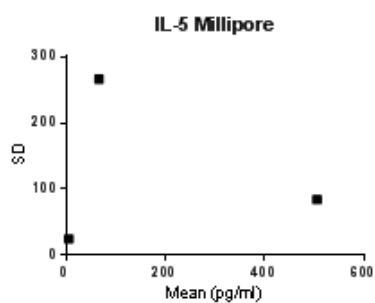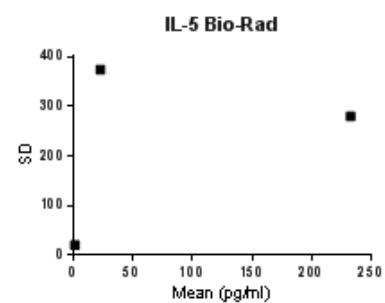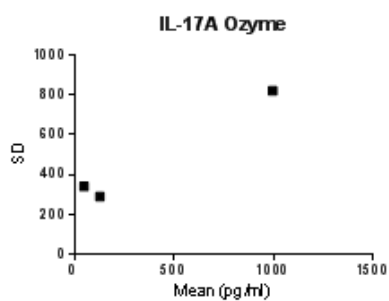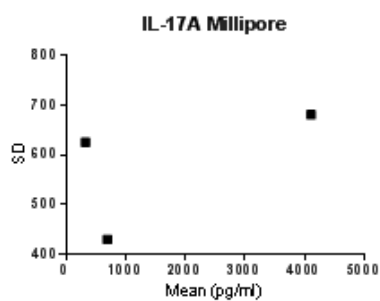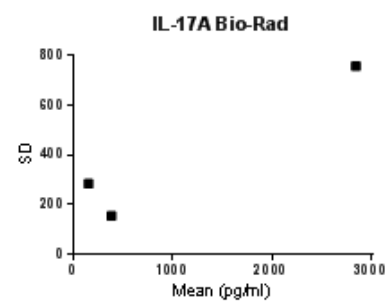

Supplement: MOESM8 [file 12865_2016_182_MOESM8_ESM.pdf]
